# Supplementary material for: Synthesis of core–shell nanoparticles based on interfacial energy transfer for red emission and highly sensitive temperature sensing
Source: Royal Society of Chemistry journal article supplement (doi:10.1039/d2dt02938c), 2022-01-01
Supplement: d2dt02938c1.pdf [file d2dt02938c1.pdf]

## Supporting Information

### Establishment of core-shell nanoparticles based on interfacial energy transfer for red emission and highly-sensitive temperature sensing

Xiumei Yin<sup>1a</sup>, Qi Xiao<sup>1a</sup>, Lin Lv<sup>a,b</sup>, Xingyu Wu<sup>a,b</sup>, Ziyi Zhao<sup>a</sup>, Jianshan He<sup>a</sup>, Xinyao Dong<sup>a</sup>, Ying Tian<sup>\*b</sup>, Xixian Luo<sup>\*a</sup>

**a:** Key Laboratory of New Energy and Rare Earth Resource Utilization of State Ethnic Affairs Commission, Key Laboratory of Photosensitive Materials & Devices of Liaoning Province, School of Physics and Materials Engineering, Dalian Minzu University, 18 Liaohe West Road, Dalian 116600, P. R. China.

**b:** Department of Physics, Dalian Maritime University, Dalian, Liaoning 116026, PR.

## I. Experimental section

### 1. Experimental

**1.1 Materials:** 1-Octadecene (ODE; 90%), oleic acid (OA; 90%), and  $\text{Re}(\text{CH}_3\text{COO})_3 \cdot 4\text{H}_2\text{O}$  were purchased from Alfa Aesar. Ammonium fluoride ( $\text{NH}_4\text{F}$ ), sodium hydroxide ( $\text{NaOH}$ ), methanol, cyclo-hexane, and ethanol were purchased from Tianjinzhiyuan Chemical Reagent Co. All  $\text{Re}(\text{CH}_3\text{COO})_3$  were dissolved in deionized water,  $\text{NaOH}$  and  $\text{NH}_4\text{F}$  were dissolved in methanol solution. All materials purchased were used directly without further purification.

### 1.2 Synthesis

**Synthesis of the  $\text{NaYF}_4:\text{Er}^{3+}, \text{Tm}^{3+}$  core nanoparticles:** All UC nanoparticles were prepared by the co-precipitation method<sup>[1]</sup>. Firstly, 12 mL OA and 28 mL ODE were added into a 100 mL-flask, and then mixed with aqueous solution (8 mL) containing 1.6 mmol  $\text{Re}(\text{CH}_3\text{COO})_3$ . The resulting mixture was heated to 150 °C for 30 min with constant stirring to obtain lanthanide-oleate complexes, and then cooled down to room temperature. Further, the methanol solution of 4 mL  $\text{NaOH}$  (4 mmol) and 16 mL  $\text{NH}_4\text{F}$  (6.4 mmol) were added into the lanthanide-oleate complexes and insulated at

50 °C for 40 min. Methanol and oxygen were removed by heating up to 100 °C in Argon (Ar) atmosphere. After that, the solution was quickly heated (in 15 min) to 300 °C and kept for 1.5 h. Then the core UC nanoparticles of  $\text{NaYF}_4:\text{Er}^{3+},\text{Tm}^{3+}$  were obtained after cooling down to room temperature. The resulting nanoparticles were precipitated by addition of ethanol, collected by centrifugation at 9000 rpm for 5 min, and washed with ethanol for several times. The core UC nanoparticles were dissolved in 10 mL cyclohexane for further shell coating.

***Synthesis of  $\text{NaYF}_4:\text{Er}^{3+},\text{Tm}^{3+}@\text{NaYF}_4:\text{Yb}^{3+}$  core-active shell UC nanoparticles with different shell thickness:*** The core-active shell UC nanoparticles with different shell thickness precursor were prepared by adding  $\text{Y}(\text{CH}_3\text{COO})_3\cdot 4\text{H}_2\text{O}$ , and  $\text{Yb}(\text{CH}_3\text{COO})_3\cdot 4\text{H}_2\text{O}$  (total 0.4 mmol) into a mixture of OA (3 mL) and ODE (7 mL), and then the mixed solution was heated to 150 °C for 45 min. After cooling down to room temperature, x mmol  $\text{NaYF}_4:\text{Er}^{3+},\text{Tm}^{3+}$  core (x=0.4, 0.8, 1.6) along with methanol solution of 1 mL NaOH (1 M) and 4 mL  $\text{NH}_4\text{F}$  (0.4 M) were added into the solution. Subsequently, the solution was kept at 50 °C for 50 min. After evaporating methanol at 100 °C in Ar atmosphere, the mixture solution was quickly heated up to 300 °C (in 15 min) and kept for 1 h for the coating of inert shell. The resultant dual-layered core-shell UC nanoparticles were obtained by repeating the washing processes described in the core preparation.

***Synthesis of  $\text{NaYF}_4:\text{Er}^{3+},\text{Tm}^{3+}@\text{NaYF}_4$  core-inert shell UC nanoparticles with different shell thickness:*** The coating procedures of active shell were similar to that of inert shell. Here the  $\text{Y}(\text{CH}_3\text{COO})_3\cdot 4\text{H}_2\text{O}$  were used as the precursor, and x mmol  $\text{NaYF}_4:\text{Er}^{3+},\text{Tm}^{3+}$  core (x=0.4, 0.8, 1.6) nanoparticles were used as seeds for the growth of core-active shell UC nanoparticles.

### **1.3 Characterization**

Transmission electron microscopy (TEM), high resolution transmission electron microscopy (HRTEM), and selected-area electron diffraction (SAED) measurements were carried out by using a JEM-2100F transmission electron microscope. The UC luminescence spectra were measured by a Edinburgh FS5 fluorescence spectrometer equipped with a power-tunable 980 nm laser diode (LD) (maximum power: 2 W). The

photos of UC luminescence were obtained digitally by a Canon EOS 5D camera. Luminescence decay curves were measured by HJY TRIAX550 spectrometer equipped. Uv-vis reflective spectra were carried out by a Perkin-Elmer Lambda 9 UV/VIS/NIR spectrophotometer. Temperature-dependent luminescence characteristics of the as-prepared sample were measured in the temperature range of 300-480 K by the self-manufactured temperature heating instrument (DMU-TC450).

## II Supplementary Figures

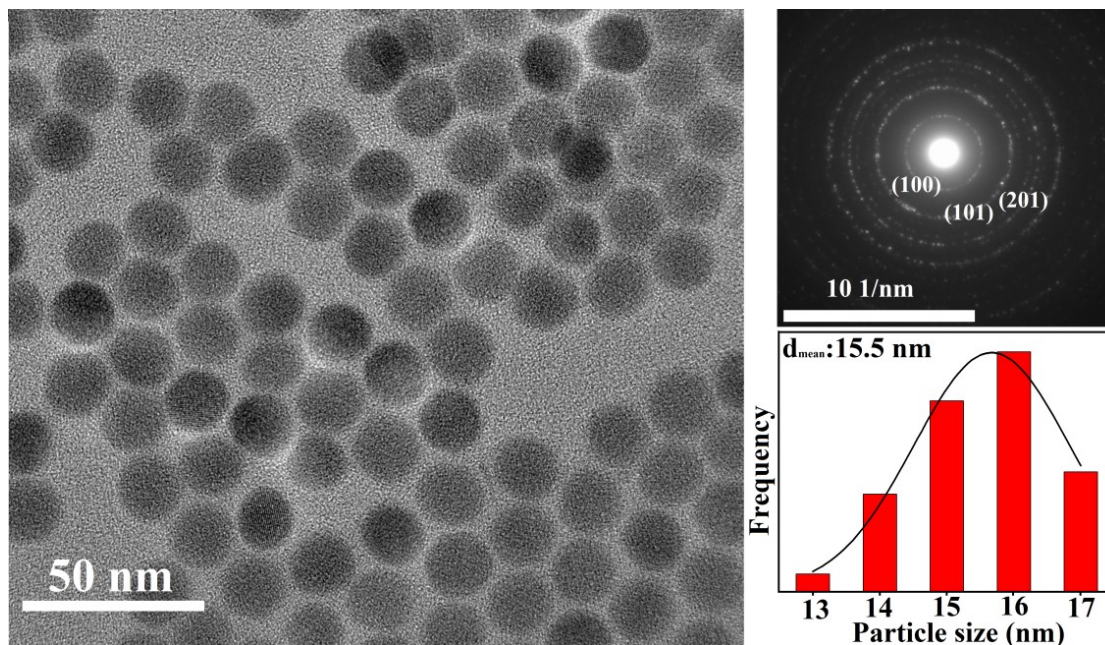

**Figure S1** TEM image, corresponding particle-size histogram of  $\text{NaYF}_4:\text{Er}^{3+}, \text{Tm}^{3+}$  core UCNs, and electron diffraction of as-prepared UCNs indicates the  $\beta\text{-NaYF}_4$  crystals.

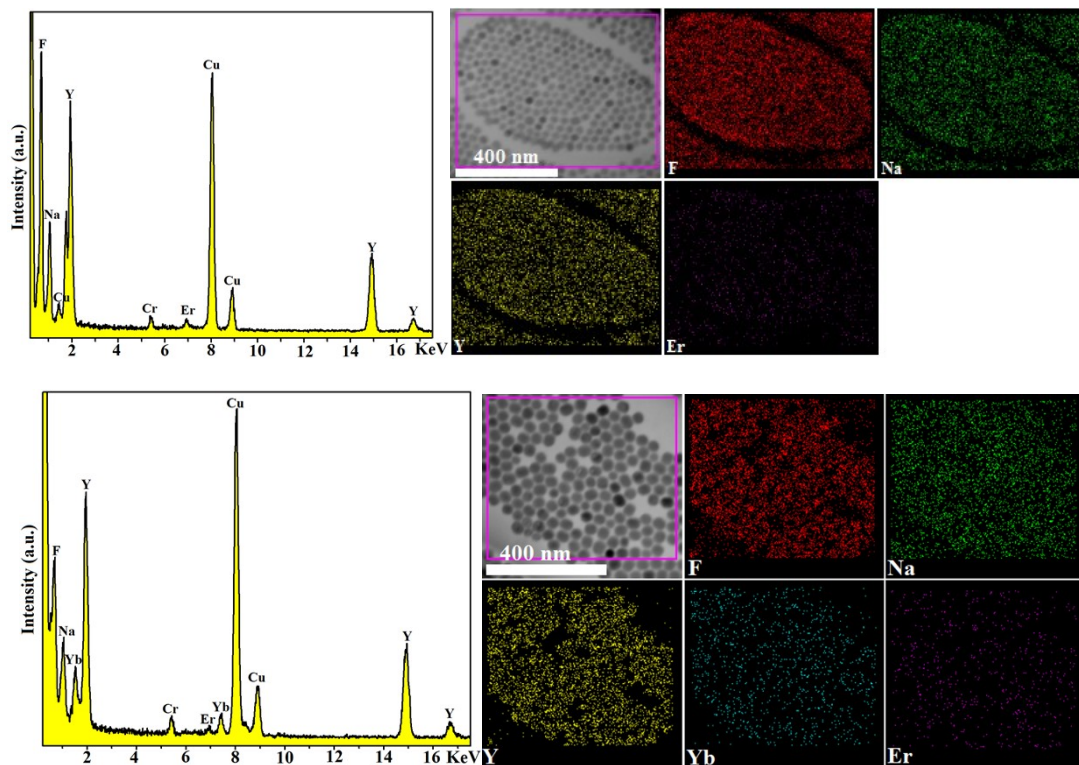

**Figure S2** EDX analysis and STEM images of  $\text{NaYF}_4:\text{Er}^{3+}, \text{Tm}^{3+}@ \text{NaYF}_4$  and  $\text{NaYF}_4:\text{Er}^{3+}, \text{Tm}^{3+}@ \text{NaYF}_4:\text{Yb}^{3+}$  UCNs. The corresponding element distribution maps of F, Na, Y, Er and Yb of the core-inert shell (up) and core-active shell (below) UCNs.

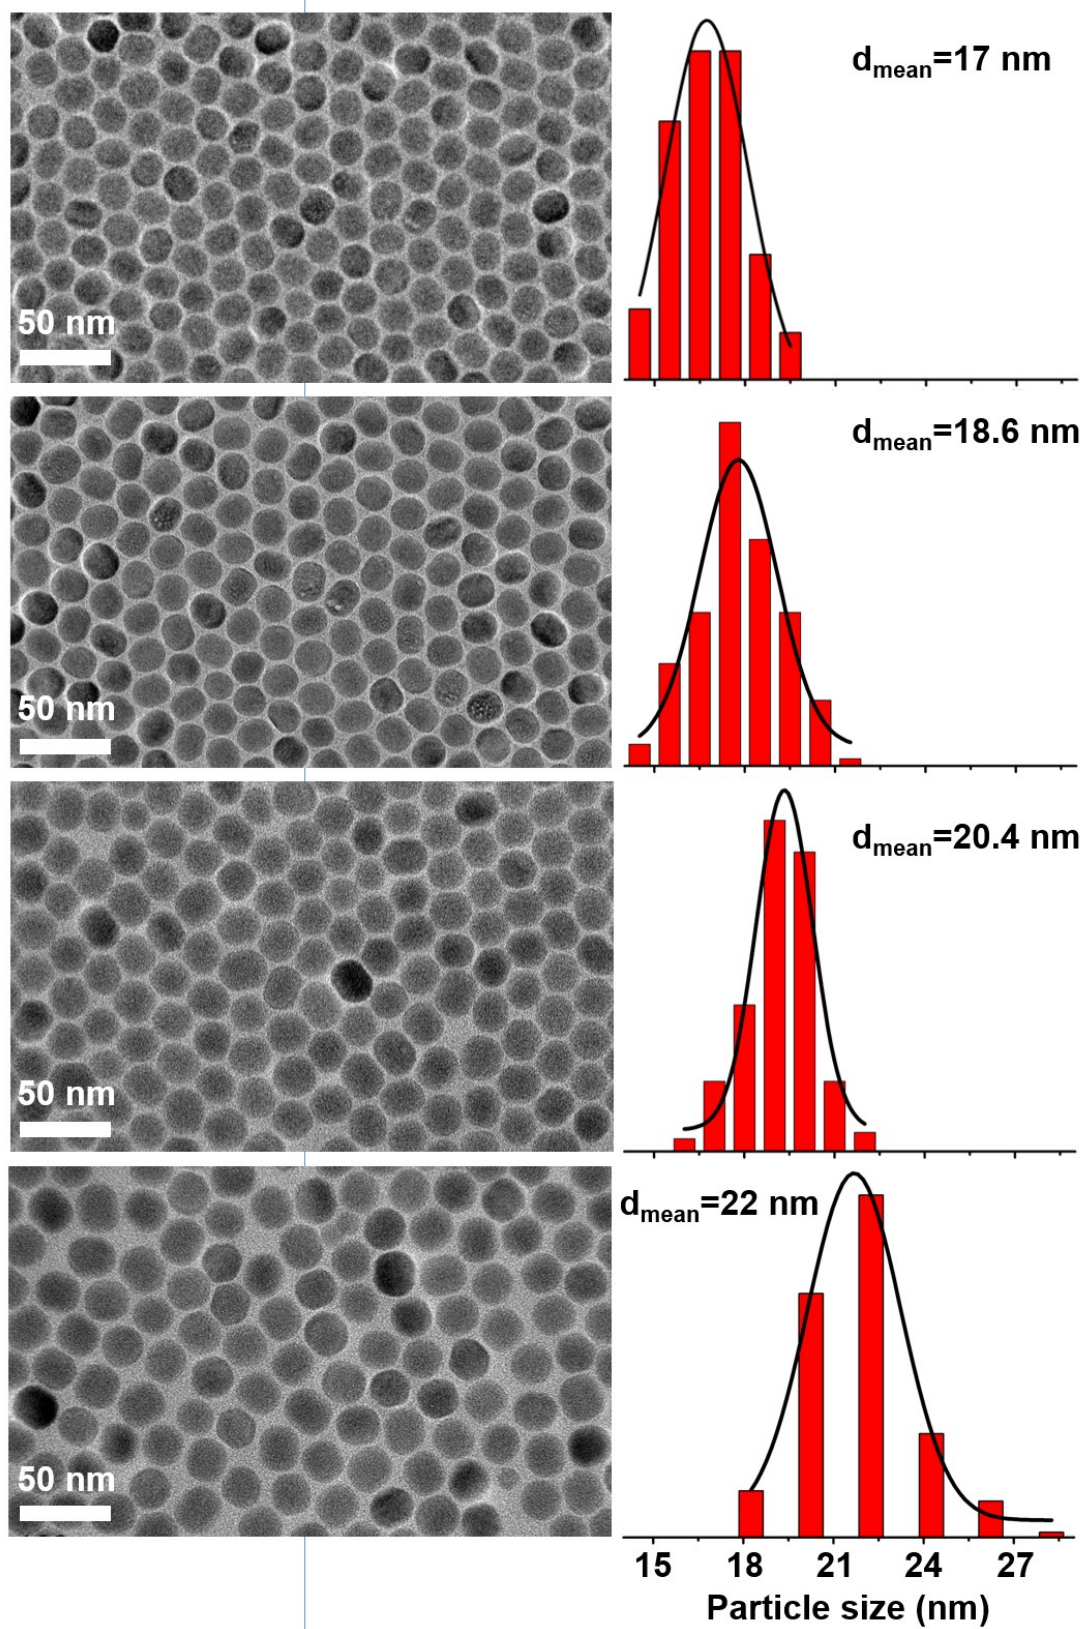

**Figure S3** TEM imagers and corresponding size distributions of  $\text{NaYF}_4:\text{Er}^{3+},\text{Tm}^{3+}@\text{NaYF}_4:\text{Yb}^{3+}$  with variable shell thickness.

## References

---

- [S1] F. Wang, R. R. Deng, X. G. Liu. Preparation of core-shell NaGdF<sub>4</sub> nanoparticles doped with luminescent lanthanide ions to be used as upconversion-based probes. *Nat. Protoc.*, 2014, 9, 1634–1644.
